# Supplementary material for: Efficacy of three-dimensionally printed polycaprolactone/beta tricalcium phosphate scaffold on mandibular reconstruction
Source: PubMed Central journal article supplement (PMC7080805; doi:10.1038/s41598-020-61944-w), 2020-03-18
Supplement: 41598_2020_61944_MOESM1_ESM.pdf [file 41598_2020_61944_MOESM1_ESM.pdf]

**Supplementary Information**

Article in *Scientific Reports*

**Efficacy of three-dimensionally printed polycaprolactone/beta tricalcium phosphate scaffold on mandibular reconstruction**

Sanghoon Lee, Dami Choi, Jin-Hyung Shim, Woong Nam

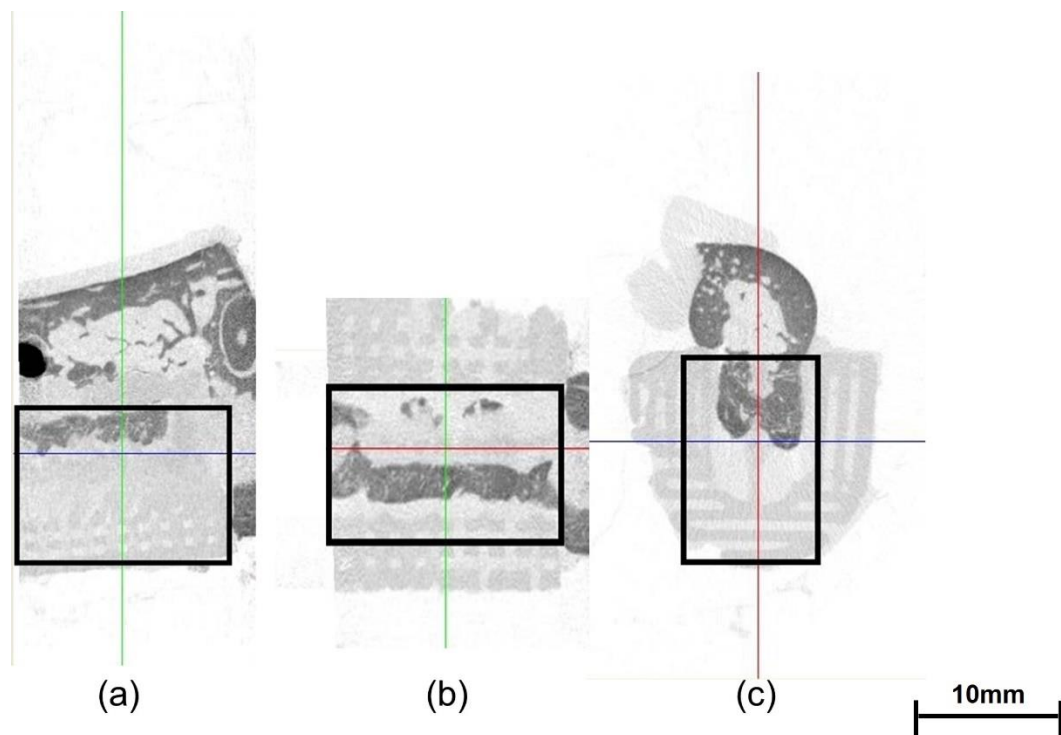

**Supplementary figure S1. Region of interest (ROI) in micro-computed tomographic analysis. ROI (length: 20 mm, width: 10mm and height: 10 mm) is shown in (a) sagittal view, (b) axial view (c) coronal view.**

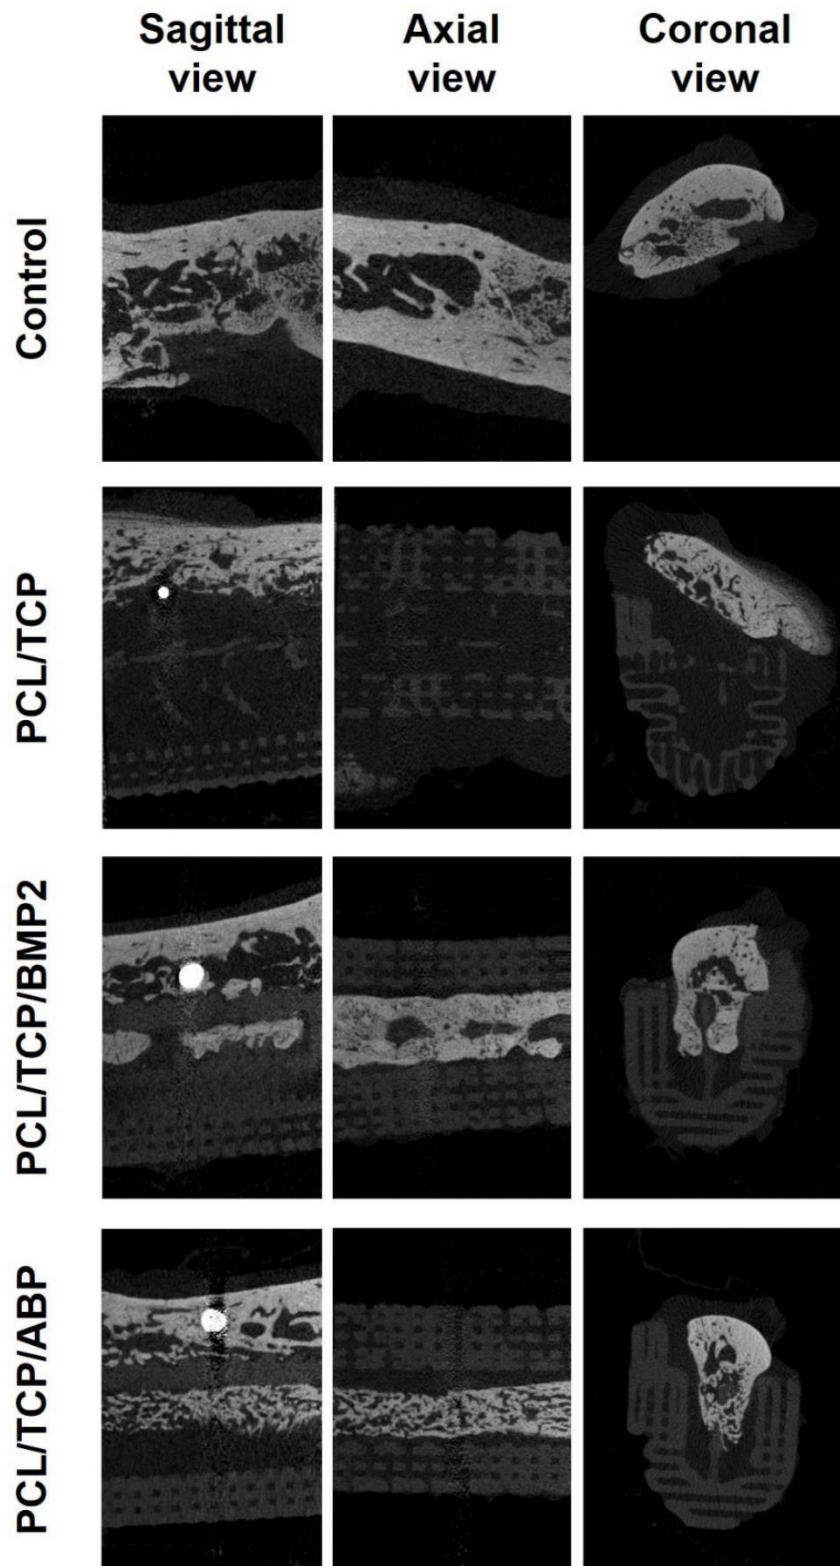

Supplementary figure S2. De novo bone formation in micro-computed tomography.

**Supplementary table S1. The entire list of samples in micro computed tomographic analysis (n=4, respectively)**

| Group        |      | BV [mm <sup>3</sup> ] | TV [mm <sup>3</sup> ] | BV/TV [%] | Tb.N. 1/mm] | Tb. Th. [mm] | Tb.Sp. [mm] |
|--------------|------|-----------------------|-----------------------|-----------|-------------|--------------|-------------|
| Control      | 1L_1 | 21.72192              | 611.7652              | 3.5507    | 0.06192     | 0.57347      | 4.03022     |
| Control      | 1L_2 | 10.66517              | 611.7652              | 1.74334   | 0.04723     | 0.36911      | 4.9486      |
| Control      | 2L_1 | 18.96104              | 611.7652              | 3.0994    | 0.06263     | 0.4949       | 4.77029     |
| Control      | 2L_2 | 71.92643              | 539.97055             | 13.32044  | 0.28017     | 0.47544      | 3.9391      |
| Control      | 4R_1 | 14.93379              | 611.7652              | 2.4411    | 0.04962     | 0.49198      | 4.99995     |
| Control      | 4R_2 | 30.14735              | 546.79385             | 5.51348   | 0.11799     | 0.46728      | 5.06816     |
| Control      | 6L_1 | 42.38388              | 819.26879             | 5.17338   | 0.15506     | 0.33364      | 4.14795     |
| Control      | 6L_2 | 56.9055               | 819.26879             | 6.94589   | 0.29726     | 0.23367      | 3.04188     |
| PCL/TCP      | 1R_1 | 13.46684              | 612.99611             | 2.19689   | 0.07887     | 0.27855      | 4.80862     |
| PCL/TCP      | 1R_2 | 36.3104               | 732.11132             | 4.95968   | 0.1166      | 0.42536      | 5.81638     |
| PCL/TCP      | 2R_1 | 20.15944              | 801.44366             | 2.51539   | 0.06693     | 0.37582      | 6.41715     |
| PCL/TCP      | 2R_2 | 22.74134              | 685.069               | 3.31957   | 0.10367     | 0.32021      | 5.20456     |
| PCL/TCP      | 3L_1 | 64.00712              | 781.50055             | 8.19028   | 0.12462     | 0.65721      | 4.7855      |
| PCL/TCP      | 3L_2 | 31.74782              | 743.73231             | 4.26872   | 0.07423     | 0.57509      | 6.00437     |
| PCL/TCP      | 5L_1 | 38.30764              | 793.12155             | 4.82998   | 0.08506     | 0.56785      | 5.72631     |
| PCL/TCP      | 5L_2 | 17.30743              | 711.77457             | 2.43159   | 0.07347     | 0.33094      | 5.52537     |
| PCL/TCP/BMP2 | 5R_1 | 128.32014             | 799.05877             | 16.05891  | 0.54488     | 0.29621      | 2.52365     |
| PCL/TCP/BMP2 | 5R_2 | 140.3853              | 807.64779             | 17.382    | 0.48172     | 0.36155      | 2.61632     |
| PCL/TCP/BMP2 | 6R_1 | 78.48574              | 611.7652              | 12.82939  | 0.212       | 0.60515      | 4.70454     |
| PCL/TCP/BMP2 | 6R_2 | 76.7043               | 611.7652              | 12.53819  | 0.24368     | 0.51454      | 4.42503     |
| PCL/TCP/BMP2 | 7L_1 | 62.18892              | 751.29347             | 8.27758   | 0.31038     | 0.2667       | 3.34374     |
| PCL/TCP/BMP2 | 7L_2 | 77.435                | 697.24833             | 11.1058   | 0.46524     | 0.23871      | 2.92949     |
| PCL/TCP/BMP2 | 8L_1 | 114.74849             | 819.26879             | 14.00621  | 0.29146     | 0.48055      | 3.9594      |
| PCL/TCP/BMP2 | 8L_2 | 99.09021              | 805.56708             | 12.30068  | 0.26081     | 0.47164      | 4.4304      |
| PCL/TCP/ABP2 | 3R_1 | 73.98472              | 755.35331             | 9.79472   | 0.20608     | 0.47529      | 3.4649      |
| PCL/TCP/ABP  | 3R_2 | 85.24843              | 819.26879             | 10.40543  | 0.24056     | 0.43255      | 3.2822      |
| PCL/TCP/ABP  | 4L_1 | 61.89279              | 761.16381             | 8.13134   | 0.13228     | 0.6147       | 4.38327     |
| PCL/TCP/ABP  | 4L_2 | 88.88462              | 819.26879             | 10.84926  | 0.20777     | 0.52217      | 3.19869     |
| PCL/TCP/ABP  | 7R_1 | 53.01299              | 746.63756             | 7.10023   | 0.14667     | 0.4841       | 4.13261     |
| PCL/TCP/ABP  | 7R_2 | 45.30782              | 703.99763             | 6.43579   | 0.13504     | 0.47657      | 3.62104     |
| PCL/TCP/ABP  | 8R_1 | 98.06389              | 819.26879             | 11.96968  | 0.28907     | 0.41408      | 3.64635     |
| PCL/TCP/ABP  | 8R_2 | 40.13849              | 819.26879             | 4.89931   | 0.1614      | 0.30354      | 4.29061     |

## Supplementary Discussion S1

### Material and methods

Compressive strength test was carried out with block-shaped specimens of 10\*4\*10mm in length, width and height, respectively, which were tested according to ISO604 - Plastics — Determination of compressive properties.

### Results

Tests on PCL/ $\beta$ -TCP scaffold (8:2) that is identical composition and porous structure as *in vivo* experiment revealed that the mean compressive strength was 20.85 (SD =  $\pm$  1.25) Mpa (n = 3, Supplementary Figure S3). The compressive strength of our PCL/ $\beta$ -TCP scaffold is 2 times higher than that of the cancellous bone and one tenth of cortical bone in mandible <sup>1,2</sup>.

### REFERENCES

1. Hannink, G. & Arts, J. J. Bioresorbability, porosity and mechanical strength of bone substitutes: what is optimal for bone regeneration? *Injury* **42 Suppl 2**, S22-25 (2011).
2. Misch, C. E., Qu, Z. & Bidez, M. W. Mechanical properties of trabecular bone in the human mandible: implications for dental implant treatment planning and surgical placement. *J Oral Maxillofac Surg* **57**, 700-706; discussion 706-708 (1999).

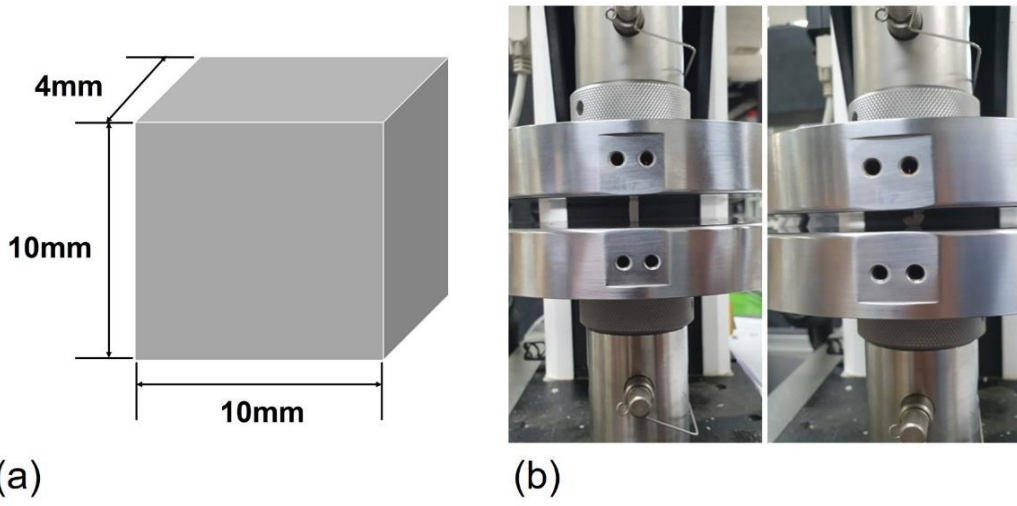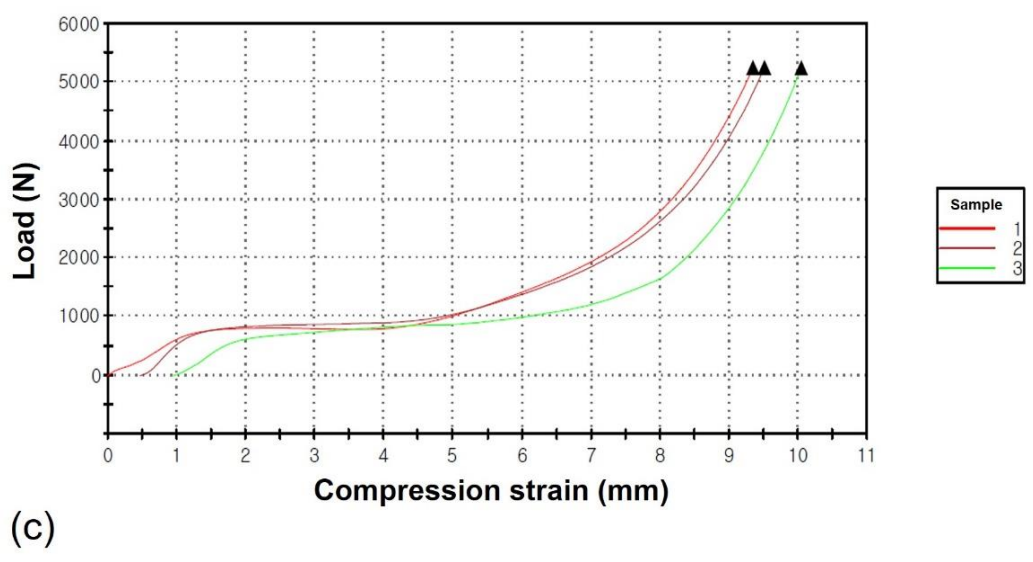

Supplementary figure S3. Compression test of 3D-printed PCL/  $\beta$ -TCP scaffolds according to ISO604 - Plastics — Determination of compressive properties. (a) dimension of experimental sample, (b) photograph of experiment, (c) result of compression test. (n=3)
